# Supplementary material for: A novel electrochemical sensor based on gold nanobipyramids and poly-l-cysteine for the sensitive determination of trilobatin
Source: Royal Society of Chemistry journal article supplement (doi:10.1039/d3an00368j), 2023-01-01
Supplement: d3an00368j1.pdf [file d3an00368j1.pdf]

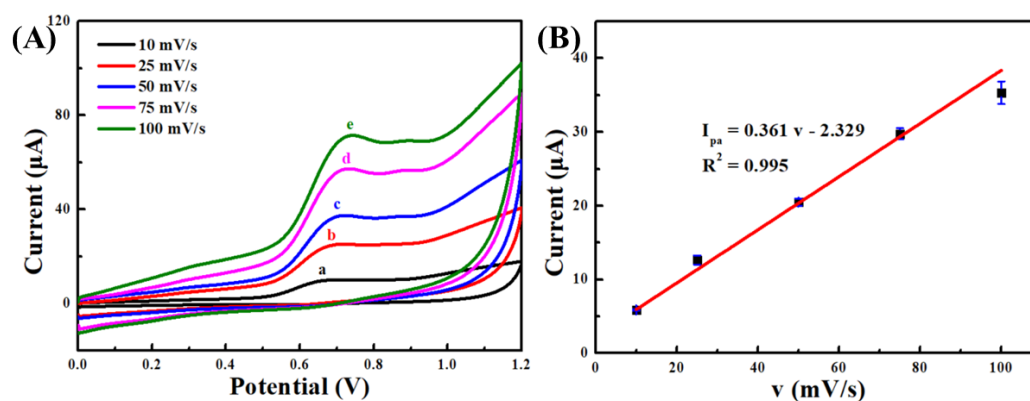

**Fig. S1** CV of Poly-L-cys/AuNPs/GCE in 0.1 M PBS (pH 6.0) solution containing 1000  $\mu$ M trehalose at different scan rates (a-e: 10 mV/s; 25 mV/s; 50 mV/s; 75 mV/s; 100 mV/s) (A); calibration curve of oxidation peak current versus scan rate (B).

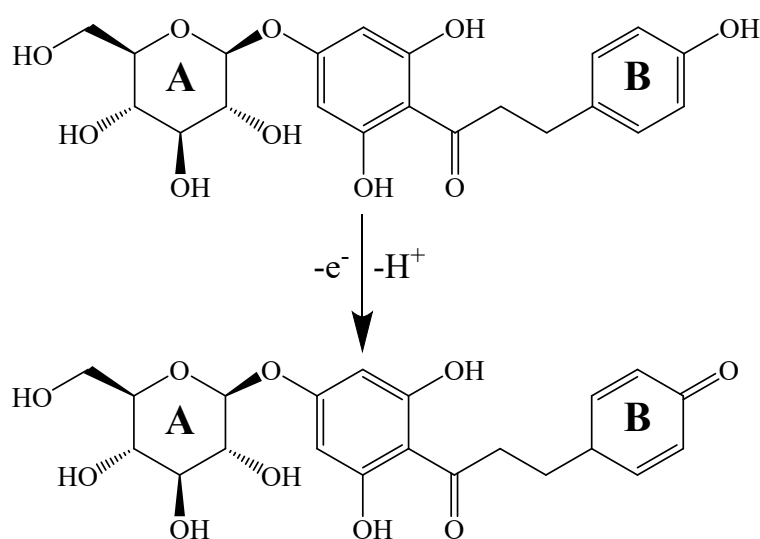

**Fig. S2** The possible mechanism for the electrochemical processes of trilobatin.

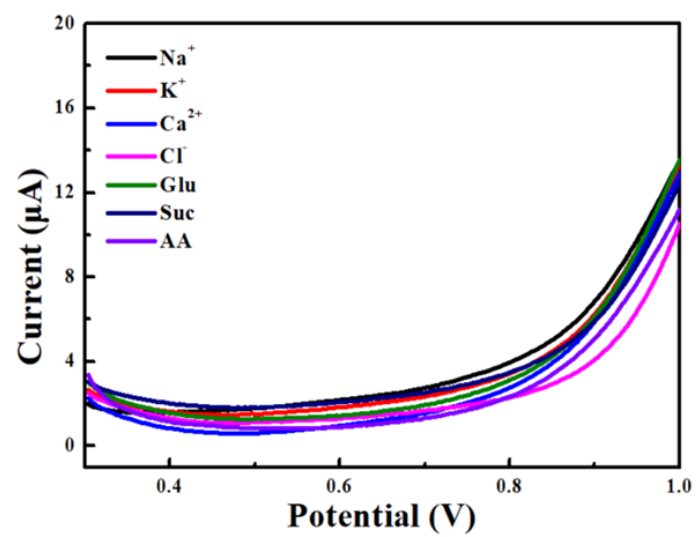

**Fig. S3** DPV of Poly-L-cys/AuNBs/GCE in 0.1 M PBS (pH 6) containing interferent without trilobatin.
